# Supplementary material for: Evaluating Ocular Symptoms and Tear Film Cytokine Profiles in Symptomatic COVID-19 Patients
Source: MDPI journal article supplement (doi:10.3390/jcm11092647), 2022-05-08
Supplement: s1 [file s1]

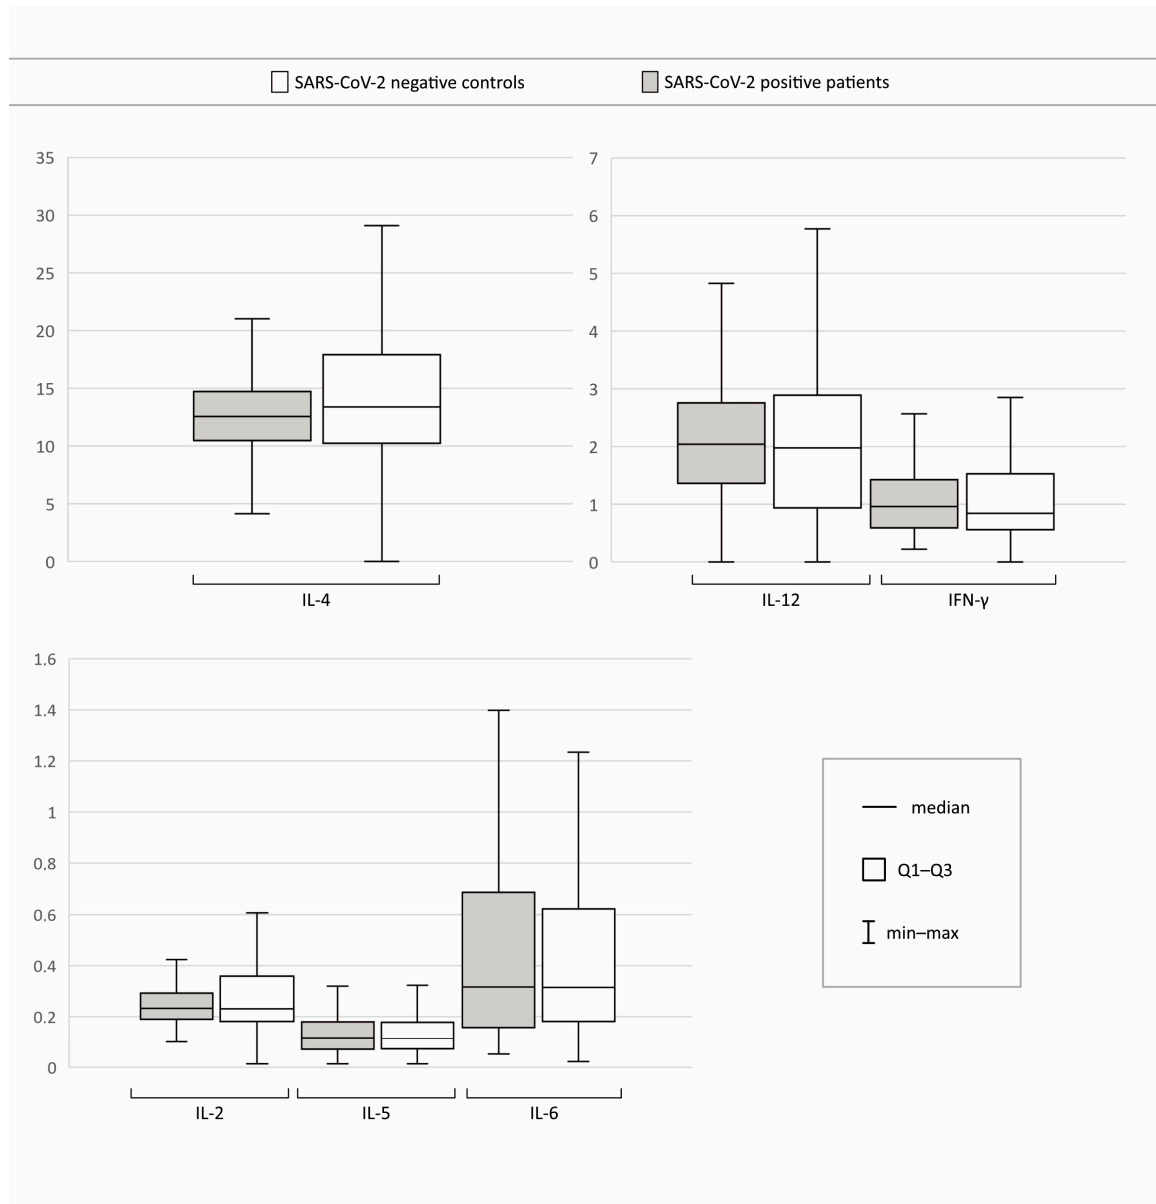

**Figure S1.** Boxplots showing non-statistical tear film cytokine levels in SARS-CoV-2-positive patients and SARS-CoV-2-negative controls.
